# Supplementary material for: Identification of Antidiabetic Compounds from the Aqueous Extract of Sclerocarya birrea Leaves
Source: MDPI journal article supplement (doi:10.3390/molecules27228095), 2022-11-21
Supplement: s1 [file s1]

## Supporting Information (SI) for:

### Bioassay-guided isolation of bioactive compounds from the leaf extract of *Sclerocarya birrea* and their glucose uptake potential in skeletal myocytes

#### Table of contents

- (S1) <sup>1</sup>H NMR and <sup>13</sup>C NMR data of Myricetin (**1**) in methanol-*d*<sub>4</sub> compared to those reported by (He et al., 2009) in DMSO-*d*<sub>6</sub>
- (S2) <sup>1</sup>H NMR and <sup>13</sup>C NMR data of Myricetin-3-O-β-D-glucuronide (**2**) in methanol-*d*<sub>4</sub> compared to those reported by (Granica et al., 2013) in methanol-*d*<sub>4</sub>
- (S3) <sup>1</sup>H NMR and <sup>13</sup>C NMR data of Quercetin-3-O-β-D-glucuronide (**3**) in methanol-*d*<sub>4</sub> compared to those reported by (Moon et al., 2001) in methanol-*d*<sub>4</sub>
- (S4) Relative Glucose uptake activity of Marula fractions in C2C12 myocytes over a range of 0.01-100 μg/ml. Activity is expressed relative % to the baseline glucose uptake (control) set at 0% and the positive control insulin (Ins) set at 100%. Active fraction (fraction 3) exhibited comparable potency to Insulin. P value < \*p < 0.05, \*\*p < 0.01. \*\*\*p < 0.001
- (S5) HRESIMS spectrum of Myricetin (**1**)
- (S6) HRESIMS spectrum of Myricetin-3-O-β-D-glucuronide (**2**)
- (S7) HRESIMS spectrum of Quercetin-3-O-β-D-glucuronide (**3**)
- (S8) MS fragmentation pattern of peak 1 overlaid with MSMS fragmentation pattern of peak 1
- (S9) MS fragmentation pattern of peak 2 overlaid with MSMS fragmentation pattern of peak 2
- (S10) MS fragmentation pattern of peak 3 overlaid with MSMS fragmentation pattern of peak 3
- (S11) MS fragmentation pattern of peak 4 overlaid with MSMS fragmentation pattern of peak 4
- (S12) MS fragmentation pattern of peak 5 overlaid with MSMS fragmentation pattern of peak 5
- (S13) MS fragmentation pattern of peak 6 overlaid with MSMS fragmentation pattern of peak 6

**Table S1**  $^1\text{H}$  NMR and  $^{13}\text{C}$  NMR data of Myricetin (**1**) in methanol- $d_4$  compared to those reported by (He et al.,2009) in DMSO- $d_6$

| Position | $^1\text{H}$ (ppm, J in Hz) of isolated myricetin in $\text{CD}_3\text{OD}$ | $^1\text{H}$ (ppm, J in Hz) in literature data in DMSO- $d_6$ | $^{13}\text{C}$ (ppm) of isolated myricetin in $\text{CD}_3\text{OD}$ | $^{13}\text{C}$ (ppm, J in Hz) literature data in DMSO- $d_6$ |
|----------|-----------------------------------------------------------------------------|---------------------------------------------------------------|-----------------------------------------------------------------------|---------------------------------------------------------------|
| 2        |                                                                             |                                                               | 145.5                                                                 | 146.8                                                         |
| 3        |                                                                             |                                                               | 136.5                                                                 | 135.9                                                         |
| 4        |                                                                             |                                                               | 178.3                                                                 | 175.7                                                         |
| 5        |                                                                             |                                                               | 161.8                                                                 | 160.7                                                         |
| 6        | 6.22 (1H, d, J=2.09 Hz)                                                     | 6.18 (1H, d, J=2.40 Hz)                                       | 98.4                                                                  | 98.2                                                          |
| 7        |                                                                             |                                                               | 164.5                                                                 | 164.1                                                         |
| 8        | 6.39 (1H, d, J=2.17 Hz)                                                     | 6.37 (1H, d, J=1.8 Hz)                                        | 93.3                                                                  | 93.2                                                          |
| 9        |                                                                             |                                                               | 157.1                                                                 | 156.1                                                         |
| 10       |                                                                             |                                                               | 102.2                                                                 | 102.9                                                         |
| 1'       |                                                                             |                                                               | 120.5                                                                 | 120.7                                                         |
| 2'6'     | 6.97 (2H, s)                                                                | 7.24 (2H, s)                                                  | 108.1                                                                 | 107.1                                                         |
| 3'       |                                                                             |                                                               | 145.5                                                                 | 145.7                                                         |
| 4'       |                                                                             |                                                               | 134.9                                                                 | 135.8                                                         |
| 5'       |                                                                             |                                                               | 145.5                                                                 | 145.7                                                         |

**Table S2**  $^1\text{H}$  NMR and  $^{13}\text{C}$  NMR data of Myricetin-3-O- $\beta$ -D-glucuronide (**2**) in methanol- $d_4$  compared to those reported by (Granica et al., 2013) in methanol- $d_4$

| Position | $^1\text{H}$ (ppm, J in Hz) of isolated myricetin-3-O- $\beta$ -D-glucuronide in $\text{CD}_3\text{OD}$ | $^1\text{H}$ (ppm, J in Hz) literature data in $\text{CD}_3\text{OD}$ | $^{13}\text{C}$ (ppm) of isolated myricetin-3-O- $\beta$ -D-glucuronide in $\text{CD}_3\text{OD}$ | $^{13}\text{C}$ (ppm, J in Hz) literature data in $\text{CD}_3\text{OD}$ |
|----------|---------------------------------------------------------------------------------------------------------|-----------------------------------------------------------------------|---------------------------------------------------------------------------------------------------|--------------------------------------------------------------------------|
| 2        |                                                                                                         |                                                                       | 157.5                                                                                             | 156.2                                                                    |
| 3        |                                                                                                         |                                                                       | 134.1                                                                                             | 133.2                                                                    |
| 4        |                                                                                                         |                                                                       | 177.8                                                                                             | 177.1                                                                    |
| 5        |                                                                                                         |                                                                       | 161.7                                                                                             | 161.2                                                                    |
| 6        | 6.21(1H, d, J=2.05 Hz)                                                                                  | 6.20 (1H, d, J=1.90 Hz)                                               | 98.5                                                                                              | 98.7                                                                     |
| 7        |                                                                                                         |                                                                       | 164.6                                                                                             | 164.2                                                                    |
| 8        | 6.39 (1H, d, J=2.00 Hz)                                                                                 | 6.38 (1H, d, J=1.90 Hz)                                               | 93.2                                                                                              | 93.4                                                                     |
| 9        |                                                                                                         |                                                                       | 157.0                                                                                             | 156.2                                                                    |
| 10       |                                                                                                         |                                                                       | 102.7                                                                                             | 101.1                                                                    |
| 1'       |                                                                                                         |                                                                       | 120.3                                                                                             | 119.7                                                                    |
| 2'       | 7.29 (2H, s)                                                                                            | 7.28 (2H, s)                                                          | 108.5                                                                                             | 108.5                                                                    |
| 3'       |                                                                                                         |                                                                       | 145.0                                                                                             | 145.4                                                                    |
| 4'       |                                                                                                         |                                                                       | 136.7                                                                                             | 136.8                                                                    |
| 5'       |                                                                                                         |                                                                       | 145.0                                                                                             | 145.4                                                                    |
| 6'       | 7.29 (2H, s)                                                                                            | 7.28 (2H, s)                                                          | 108.5                                                                                             | 108.5                                                                    |
| 1''      | 5.39 (1H, d, J=7.88Hz)                                                                                  | 5.36 (1H, d, J=7.60 Hz)                                               | 104.2                                                                                             | 103.8                                                                    |
| 2''      | 3.49-3.61 (3H, m)                                                                                       | 3.66-3.43 (3H, m)                                                     | 73.9                                                                                              | 73.6                                                                     |
| 3''      | 3.49-3.61 (3H, m)                                                                                       | 3.66-3.43 (3H, m)                                                     | 76.3                                                                                              | 76.0                                                                     |
| 4''      | 3.49-3.61 (3H, m)                                                                                       | 3.66-3.43 (3H, m)                                                     | 71.6                                                                                              | 71.2                                                                     |
| 5''      | 3.75 (1H, d, J=9.68 Hz)                                                                                 | 3.77 (1H, d, J=9.50 Hz)                                               | 75.8                                                                                              | 75.9                                                                     |
| 6''      |                                                                                                         |                                                                       | 171.7                                                                                             | 169.8                                                                    |

**Table S3**  $^1\text{H}$  NMR and  $^{13}\text{C}$  NMR data of Quercetin-3-O- $\beta$ -D-glucuronide (**3**) in methanol- $d_4$  compared to those reported by (Moon et al., 2001) in methanol- $d_4$

| Position | $^1\text{H}$ (ppm, J in Hz) of isolated quercetin-3-O- $\beta$ -D-glucuronide in $\text{CD}_3\text{OD}$ | $^1\text{H}$ (ppm, J in Hz) literature data in $\text{CD}_3\text{OD}$ | $^{13}\text{C}$ (ppm) of isolated quercetin-3-O- $\beta$ -D-glucuronide in $\text{CD}_3\text{OD}$ | $^{13}\text{C}$ (ppm, J in Hz) literature data in $\text{CD}_3\text{OD}$ |
|----------|---------------------------------------------------------------------------------------------------------|-----------------------------------------------------------------------|---------------------------------------------------------------------------------------------------|--------------------------------------------------------------------------|
| 2        |                                                                                                         |                                                                       | 161.6                                                                                             | 159.2                                                                    |
| 3        |                                                                                                         |                                                                       | 134.5                                                                                             | 135.5                                                                    |
| 4        |                                                                                                         |                                                                       | 177.9                                                                                             | 179.4                                                                    |
| 5        |                                                                                                         |                                                                       | 164.7                                                                                             | 163.2                                                                    |
| 6        | 6.10 (1H, d, J= 2.05Hz)                                                                                 | 6.21 (1H, d, J= 2.00Hz)                                               | 101.6                                                                                             | 100.1                                                                    |
| 7        |                                                                                                         |                                                                       | 168.2                                                                                             | 166.2                                                                    |
| 8        | 6.30 (1H, d, J= 2.05Hz)                                                                                 | 6.40 (1H, d, J= 2.00Hz)                                               | 93.3                                                                                              | 94.9                                                                     |
| 9        |                                                                                                         |                                                                       | 157.7                                                                                             | 158.6                                                                    |
| 10       |                                                                                                         |                                                                       | 104.26                                                                                            | 105.8                                                                    |
| 1'       |                                                                                                         |                                                                       | 125.8                                                                                             | 123.0                                                                    |
| 2'       | 7.78 (1H, bs)                                                                                           | 7.60-7.67 (2H, m)                                                     | 114.7                                                                                             | 116.2                                                                    |
| 3'       |                                                                                                         |                                                                       | 144.5                                                                                             | 146.1                                                                    |
| 4'       |                                                                                                         |                                                                       | 148.5                                                                                             | 150.0                                                                    |
| 5'       | 6.75 (1H, d, J= 8.48Hz)                                                                                 | 6.85 (1H, d, J= 8.48Hz)                                               | 116.4                                                                                             | 117.4                                                                    |
| 6'       | 7.44 (1H, dd)                                                                                           | 7.60-7.67 2H, m)                                                      | 121.5                                                                                             | 123.6                                                                    |
| 1''      | 5.32 (1H, d, J= 7.57Hz)                                                                                 | 5.34 (1H, d, J= 7.40Hz)                                               | 103.9                                                                                             | 104.4                                                                    |
| 2''      | 3.38-3.49(3H, m)                                                                                        | 3.42-3.66 (3H, m)                                                     | 74.1                                                                                              | 75.5                                                                     |
| 3''      | 3.38-3.49                                                                                               | 3.42-3.66 (3H, m)                                                     | 76.6                                                                                              | 77.7                                                                     |

|     |                       |                         |       |       |
|-----|-----------------------|-------------------------|-------|-------|
| 4'' | 3.38-3.49             | 3.42-3.66 (3H, m)       | 73.7  | 73.0  |
| 5'' | 3.55 (1H, d, J= 9.7Hz | 3.75 (1H, d, J= 9.60 Hz | 76.5  | 77.2  |
| 6'' |                       |                         | 174.9 | 172.4 |

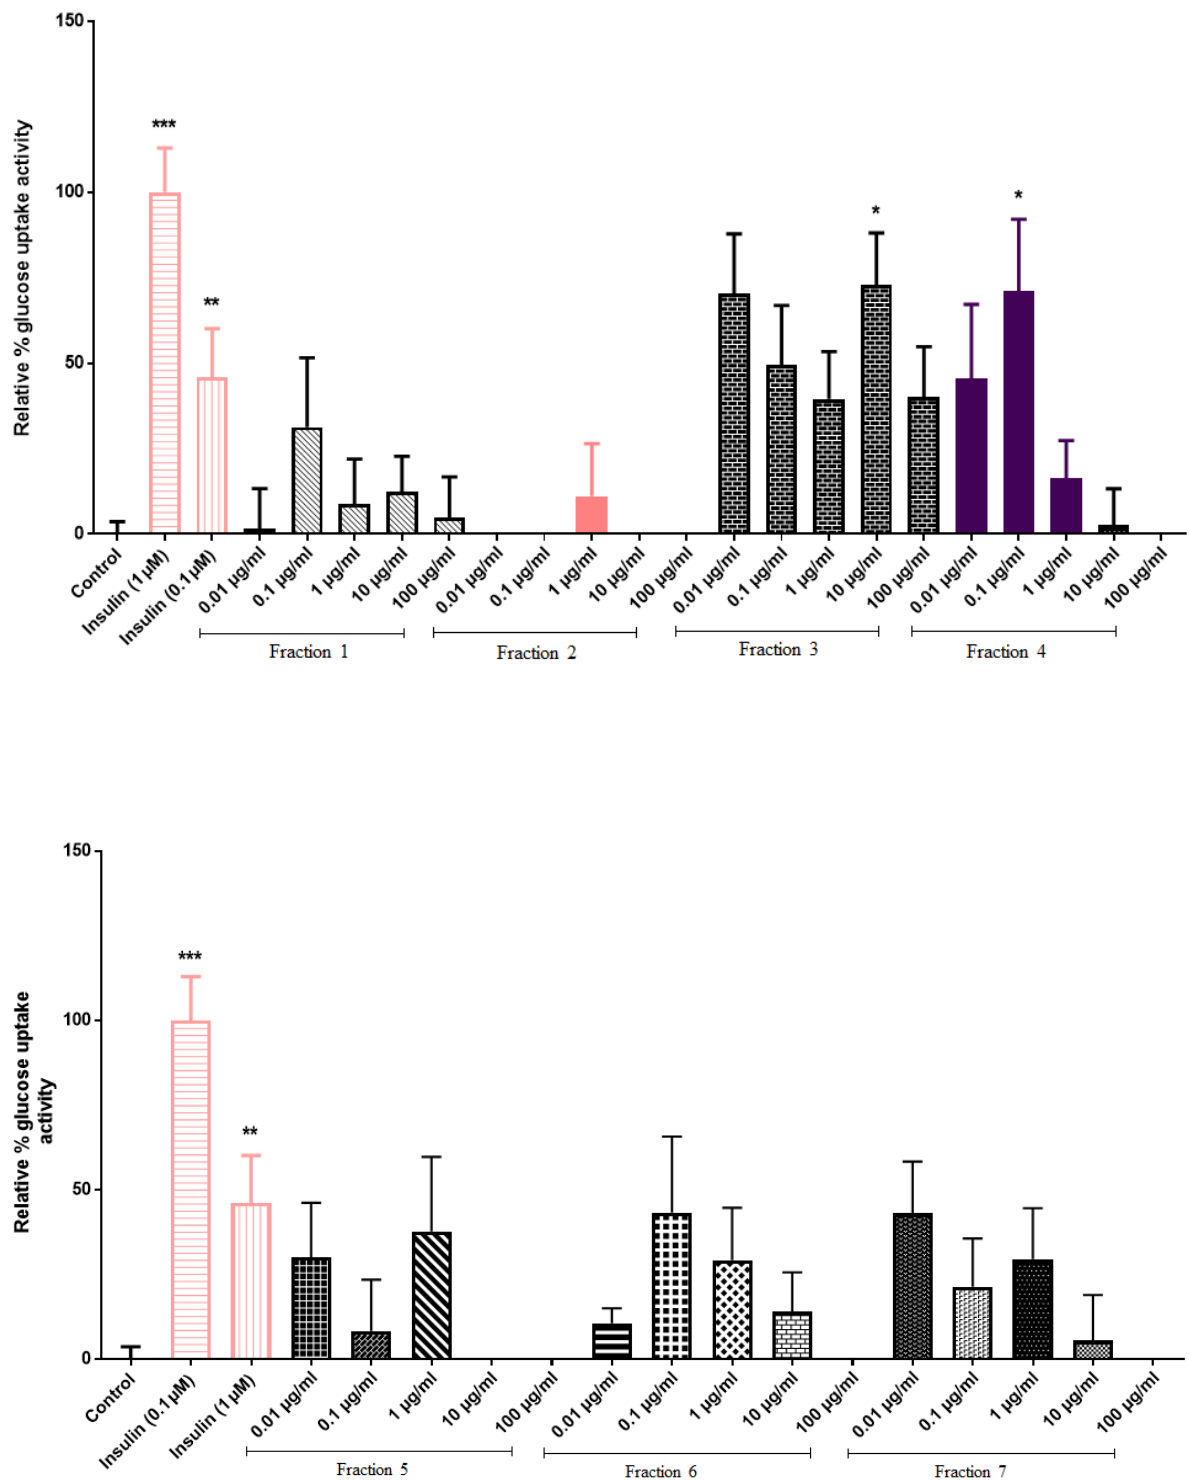

**Fig. S4.** Relative Glucose uptake activity of Marula fractions in C2C12 myocytes over a range of 0.01-100µg/ml. Activity is expressed relative % to the baseline glucose uptake (control) set at 0% and the positive control insulin (Ins) set at 100%. Active fraction (fraction 3) exhibited comparable potency to Insulin. P value < \*p < 0.05, \*\*p < 0.01. \*\*\*p < 0.001

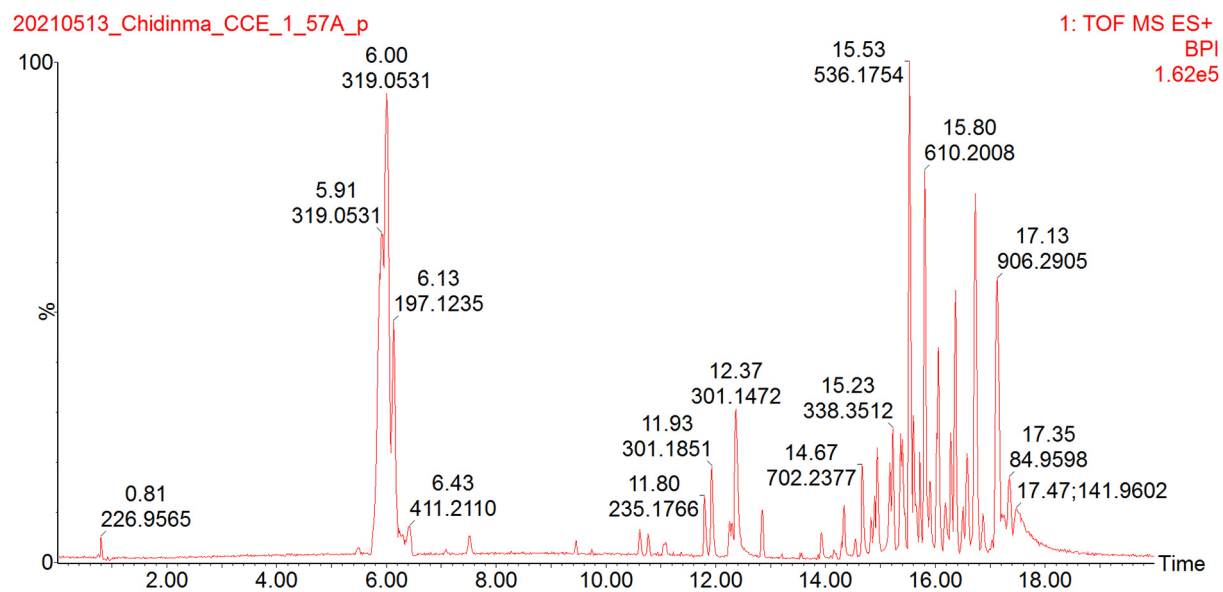

**Fig. S5.** ESI negative-mode BPI chromatogram of compound **1** (Myricetin) isolated from Fraction 4

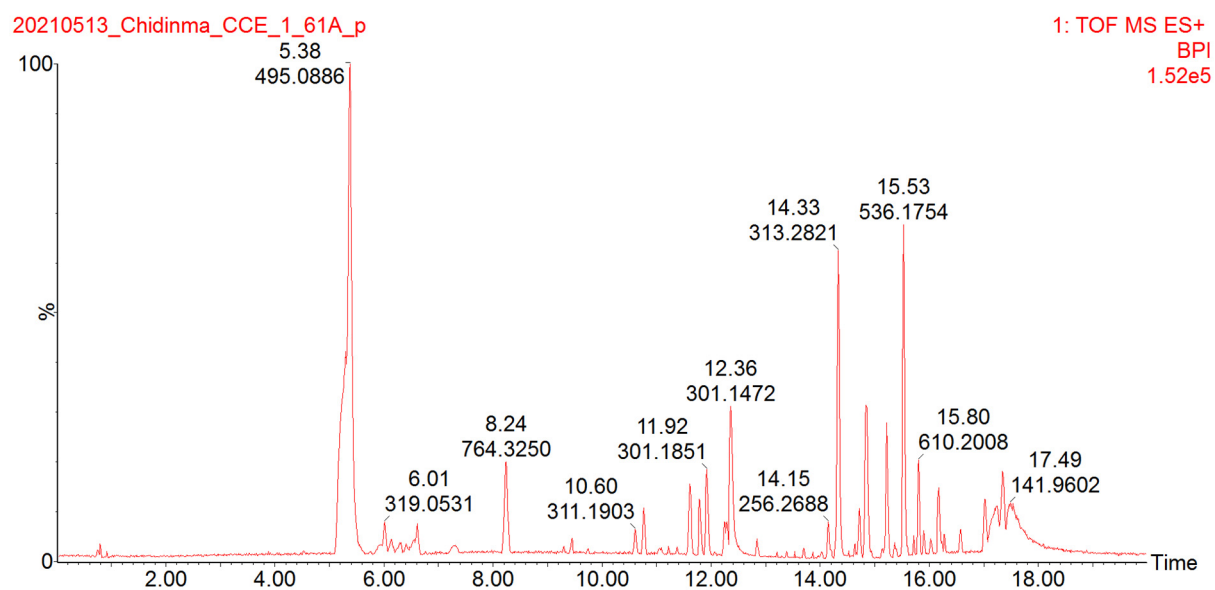

**Fig. S6.** ESI negative-mode BPI chromatogram of compound **2** (Myricetin-3-O- $\beta$ -D-glucuronide) isolated from Fraction 3



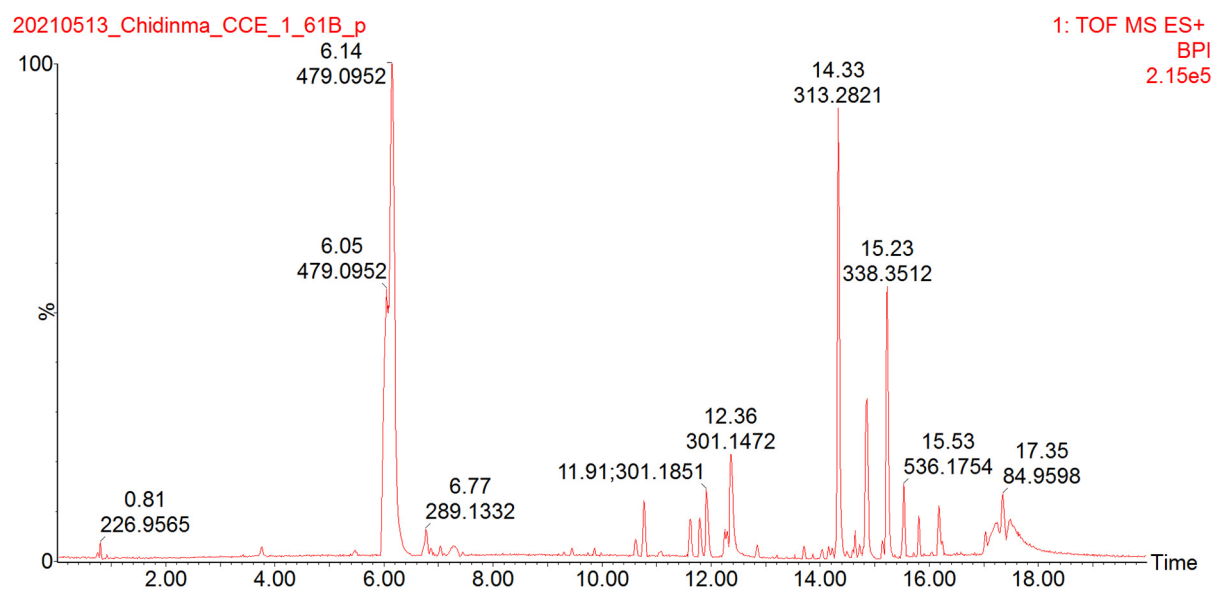

**Fig. S7.** ESI negative-mode BPI chromatogram of compound **3** (Quercetin-3-O- $\beta$ -D-glucuronide) isolated from Fraction 3

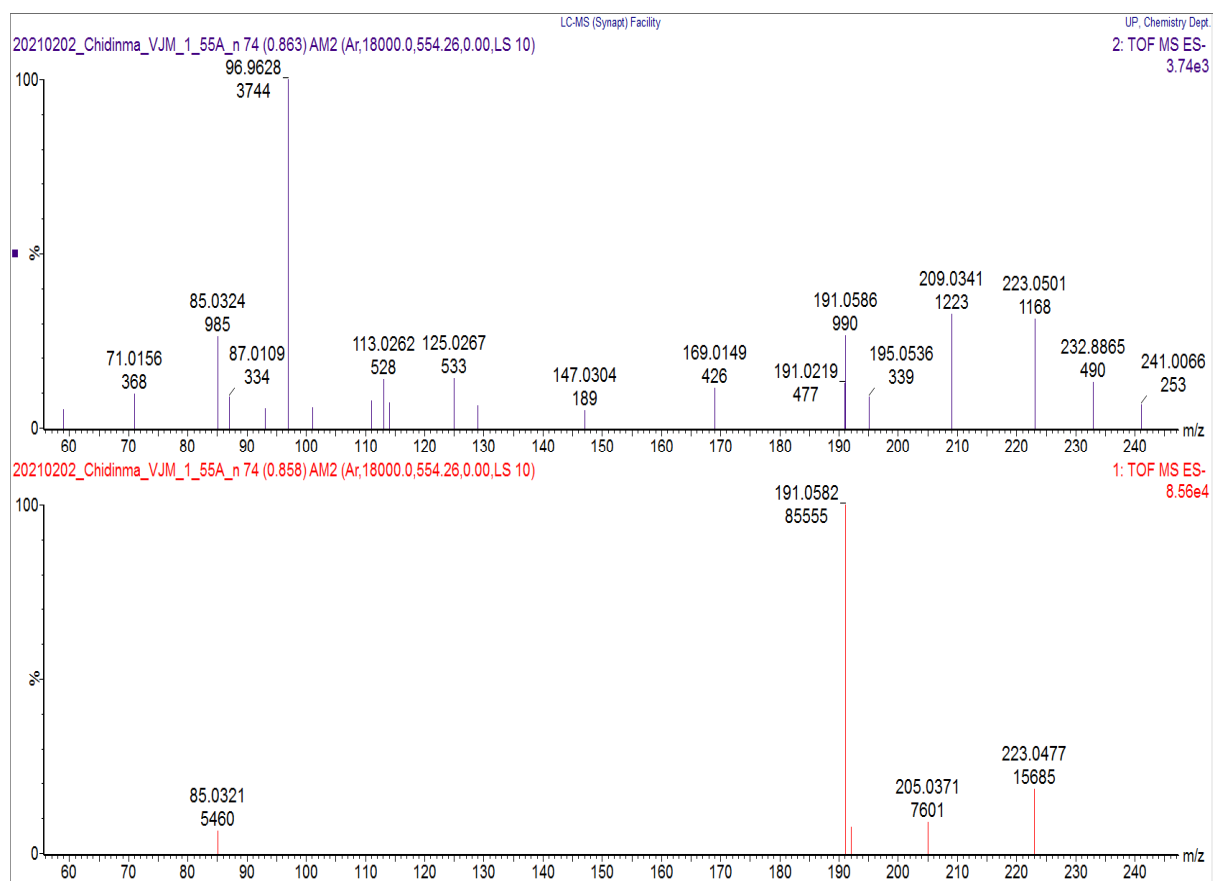

**Fig.S8.** MS fragmentation pattern of peak 1 overlaid with MSMS fragmentation pattern of peak 1

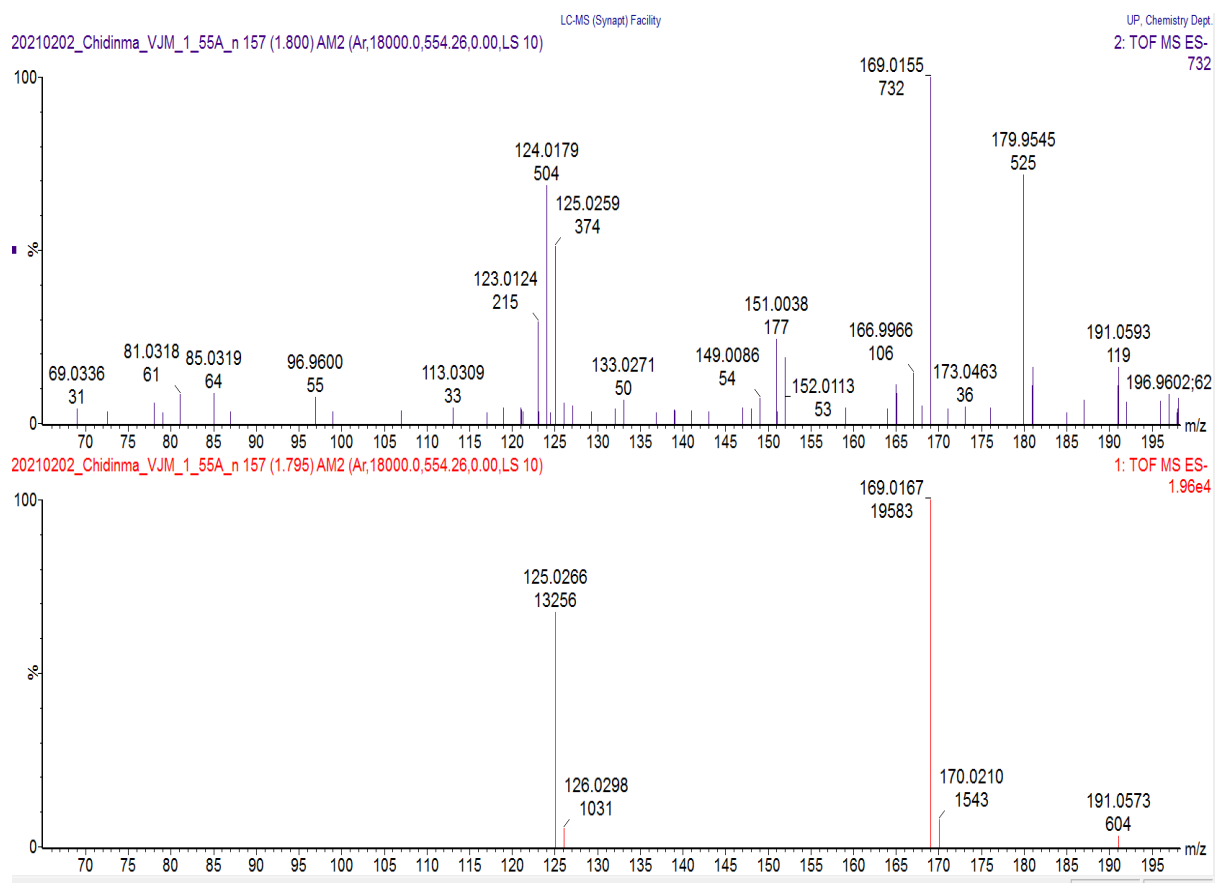

**Fig.S9.** MS fragmentation pattern of peak 2 overlaid with MSMS fragmentation pattern of peak 2

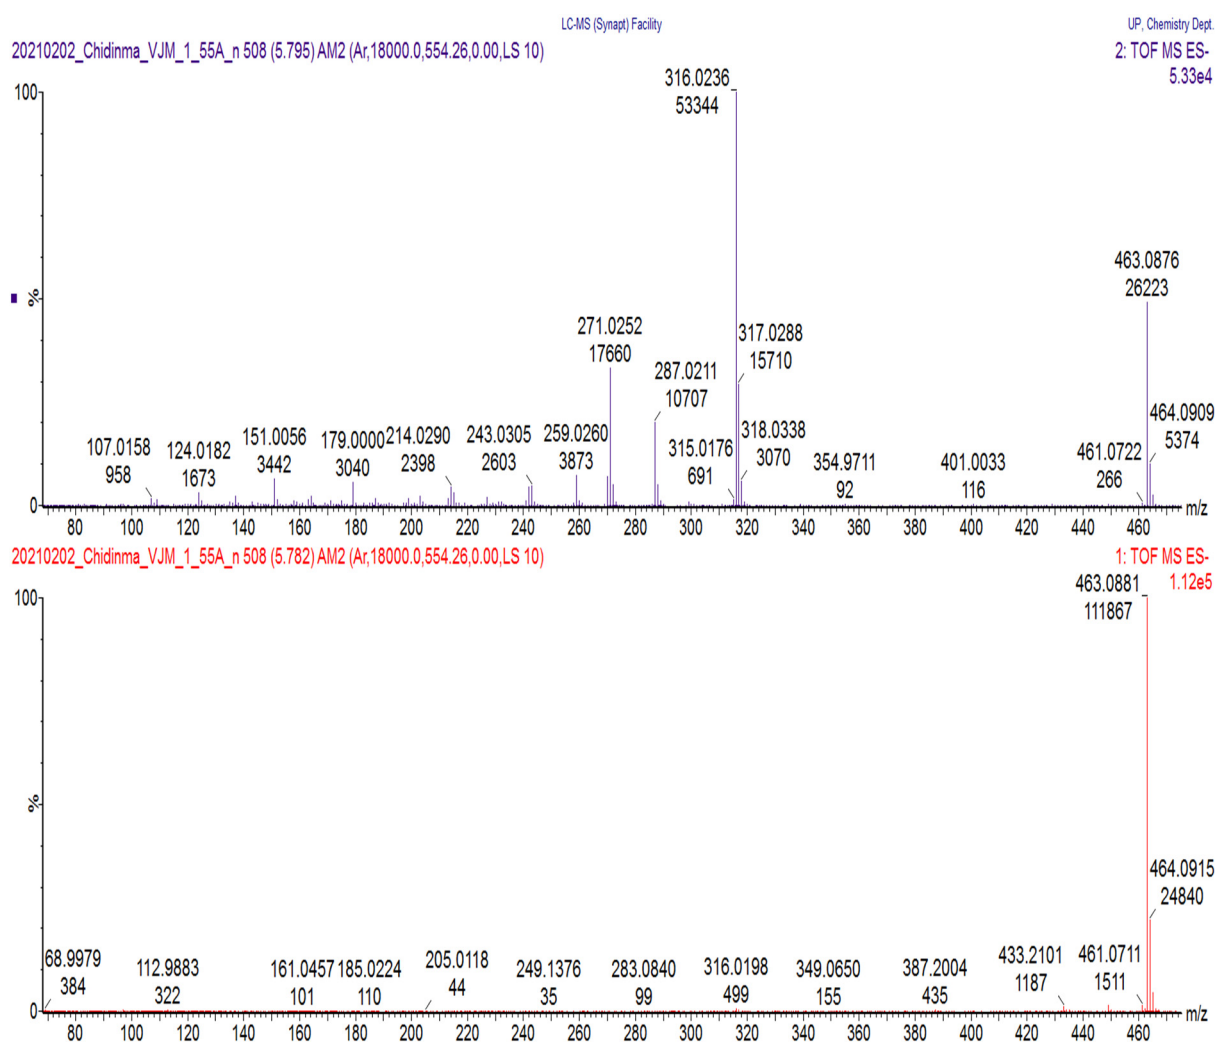

**Fig.S10.** MS fragmentation pattern of peak 3 overlaid with MSMS fragmentation pattern of peak 3

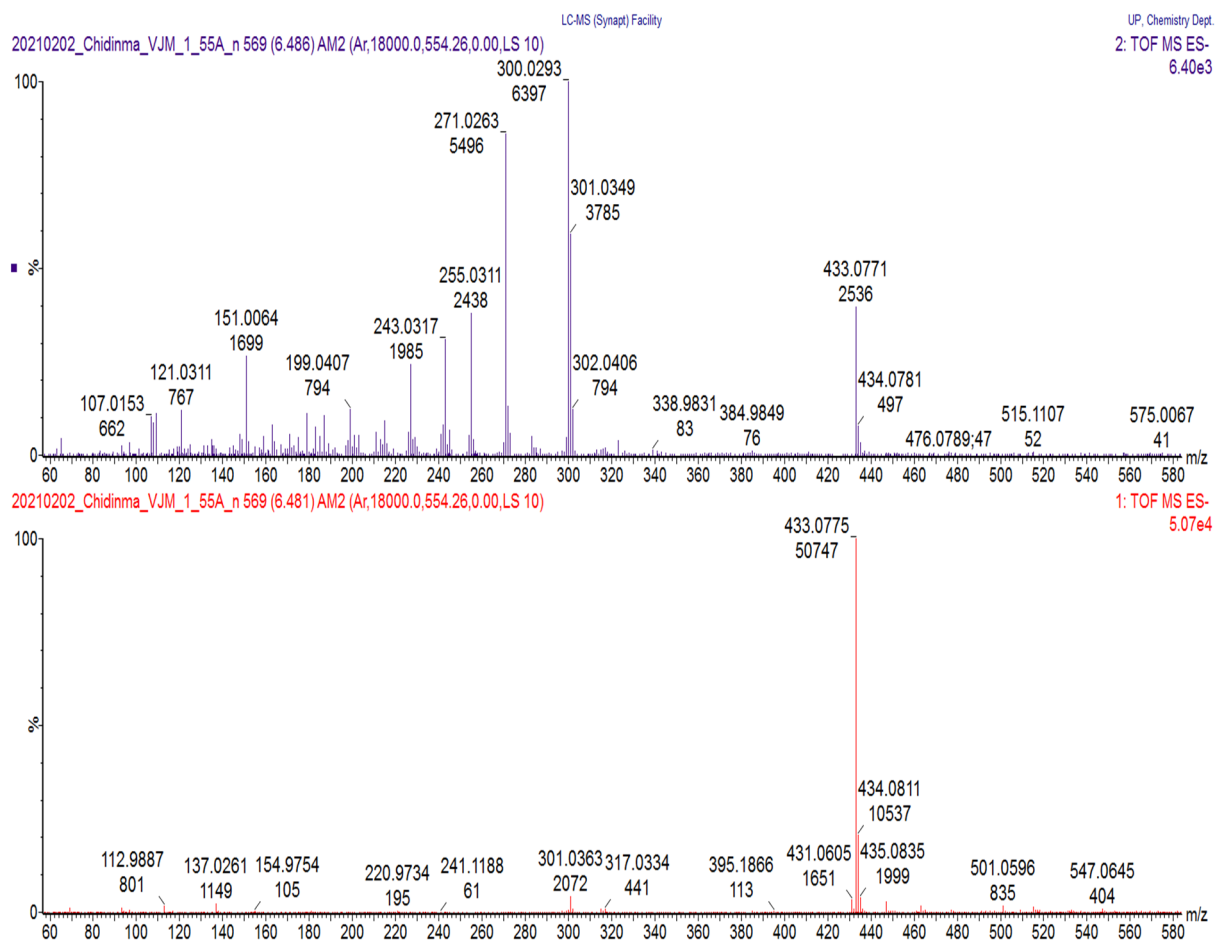

**Fig.S11.** MS fragmentation pattern of peak 4 overlaid with MSMS fragmentation pattern of peak 4

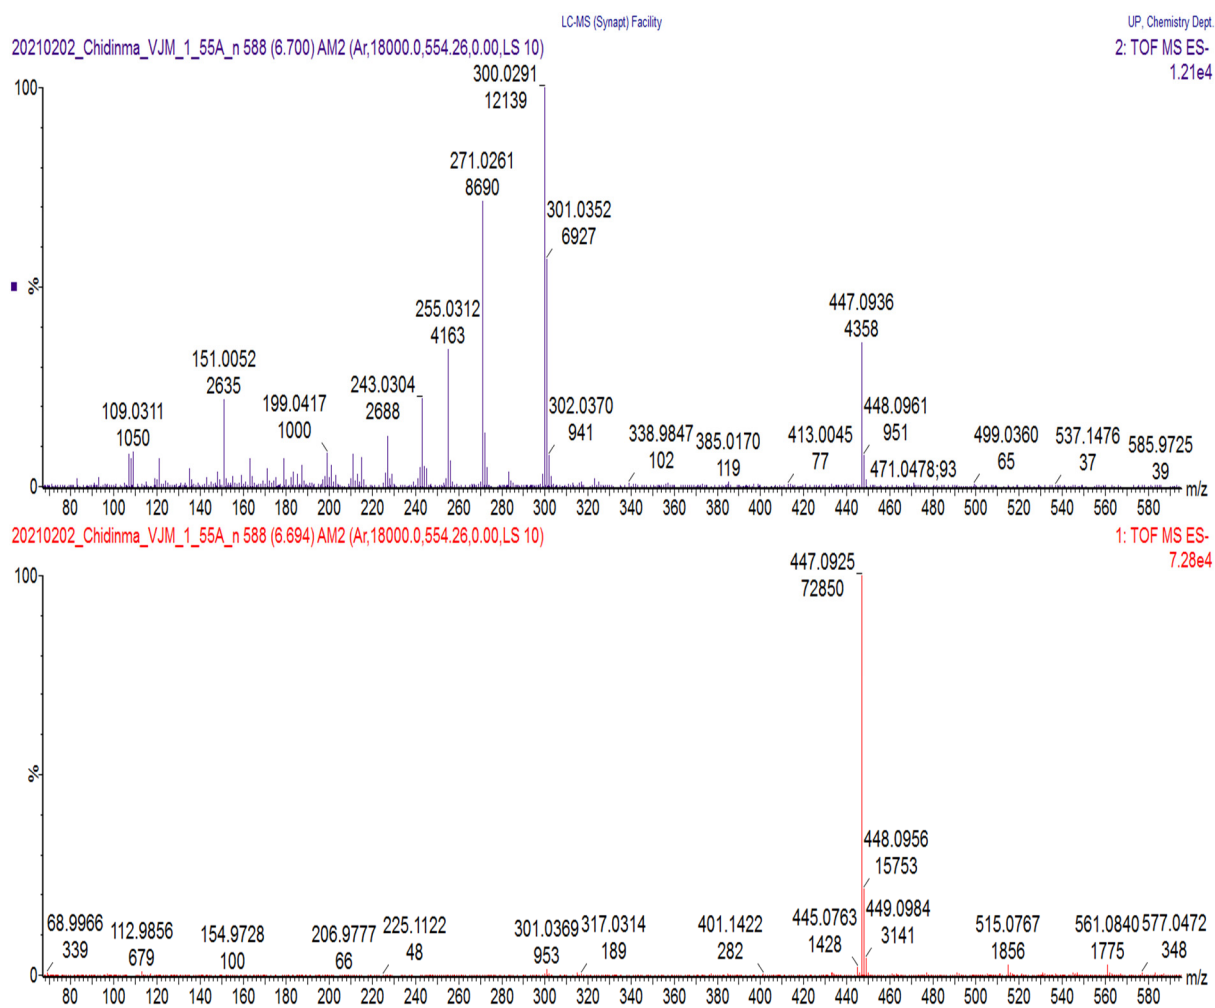

**Fig.S12.** MS fragmentation pattern of peak 5 overlaid with MSMS fragmentation pattern of peak 5

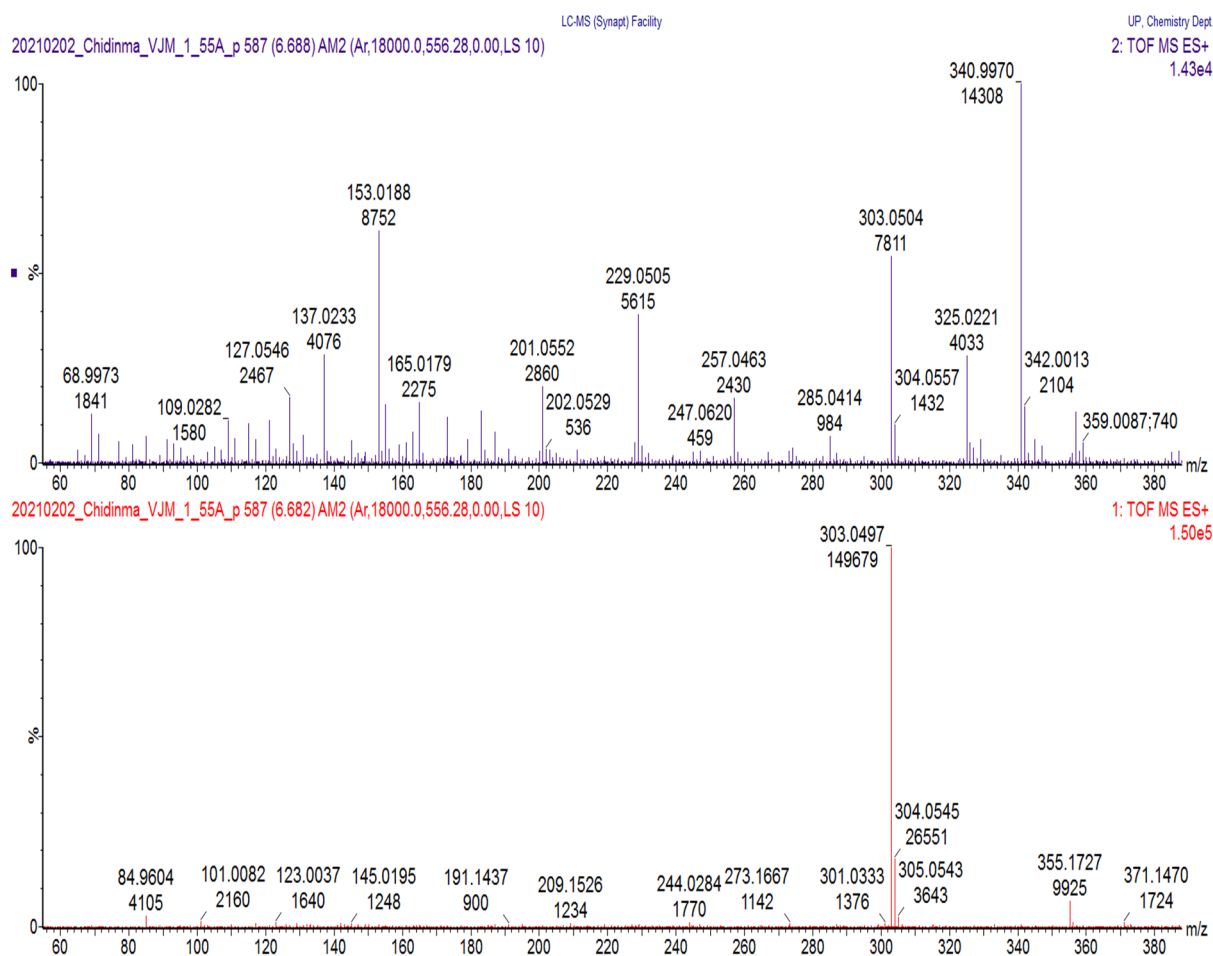

**Fig.S13.** MS fragmentation pattern of peak 6 overlaid with MSMS fragmentation pattern of peak 6

### Isolation of the chemical constituents

Compound **1** was isolated as a light-yellow solid. It had a molecular formula of  $C_{15}H_{11}O_8$  as deduced from its monoprotonated molecular ion at  $m/z$  319.0443 (calcd for  $[M+H]^+$   $m/z$  319.0454) based on the QTOF mass spectrum with eleven degrees of unsaturation. The  $^{13}C$  NMR spectroscopic data showed it to have a flavonol skeleton confirming the presence of fifteen carbon atoms, of which four are aromatic methine groups and eleven quaternary carbons (one carbonyl, six O-bearing and four aliphatic) as deduced from its DEPT 135 spectrum. The  $^1H$  NMR spectrum showed the presence of four aromatic protons; two protons resonating at  $\delta_H$  6.22 (1H, d,  $J = 2.09$  Hz, H-6) and  $\delta_H$  6.39 (1H, d,  $J = 2.17$  Hz, H-8) consistent with the meta coupled protons at H-6 and H-8 positions on the A-ring and a signal at  $\delta_H$  6.97 (2H, s, H-2', H-6') indicating presence of two protons at 2' and 6' positions appearing as a singlet due to their para substituted ring B which led to their symmetrical pattern. This indicated that the molecule was a flavonoid, which matched myricetin, previously isolated from black currant<sup>38</sup>.

Compound **2** was isolated as a light-yellow solid. It had a molecular formula of  $C_{21}H_{19}O_{14}$  as deduced from its monoprotonated molecular ion at  $m/z$  495.0886 (calcd for  $[M+H]^+$   $m/z$  495.0775) based on the QTOF mass spectrum with thirteen degrees of unsaturation. The  $^{13}C$ -NMR spectrum showed the presence of nine methine groups (four aromatic methine and five glucuronic acid methine) and twelve quaternary carbons (one carbonyl, one carboxylic acid, six O-bearing, four aliphatic) as deduced from its DEPT 135 spectrum. The  $^1H$  NMR spectrum showed the presence of four aromatic protons; two protons resonating at  $\delta_H$  6.21 (1H, d,  $J =$

2.05 Hz, H-6) and  $\delta_{\text{H}}$  6.39 (1H, d,  $J = 2.00$  Hz, H-8) consistent with the meta coupled protons at H-6 and H-8 positions on the A-ring and a signal at  $\delta_{\text{H}}$  7.29 (2H, s, H-2', H-6') indicating presence of two protons at 2' and 6' positions appearing as a singlet due to their para substituted ring B which led to their symmetrical pattern. The proposed structure was confirmed by the comparative analysis of the reported myricetin-3-O- $\beta$ -D-glucuronide to that of compound **2**<sup>39</sup>.

Compound **3** was isolated as a light-yellow solid. It had a molecular formula of  $\text{C}_{21}\text{H}_{18}\text{O}_{13}$  as deduced from its monoprotonated molecular ion at  $m/z$  479.0952 (calcd for  $[\text{M}+\text{H}]^+ m/z$  479.0826) based on the QTOF mass spectrum with thirteen degrees of unsaturation. The  $^{13}\text{C}$  NMR spectrum showed the presence of ten methine groups (five aromatic methine and five glucuronic acid methine) and eleven quaternary carbons (one carbonyl, one carboxylic acid, five O-bearing and four aliphatic) as deduced from its DEPT 135 spectrum. The  $^1\text{H}$  NMR spectrum showed signals corresponding to five aromatic protons ( $\delta_{\text{H}}$  6.10-7.78). Two proton signals at  $\delta_{\text{H}}$  6.10 (1H, d,  $J = 2.05$  Hz, H-6) and 6.30 (1H, d,  $J = 2.05$  Hz, H-8) attributable to the A ring of quercetin which were assigned to H-6 and H-8 positions respectively. Additionally, three proton signals at  $\delta_{\text{H}}$  7.78 (1H, bs, H-2'), 6.75 (1H, d,  $J = 8.48$  Hz, H-5') and 7.44 (1H, dd,  $J = 2.15$  and 2.18 Hz, H-6') were assigned to the B ring of quercetin as H-2', H-5' and H-6' respectively. These proton signals confirmed that the structure of the aglycone moiety was quercetin. The proposed structure was finally confirmed by the comparative analysis of the reported quercetin-3-O- $\beta$ -D-glucuronide to that of compound **3**<sup>39</sup>.
